# Supplementary material for: Modulation of Fecal Metabolites by Heat Stress and Diet, and Their Association with Inflammation and Leaky Gut Markers in Dairy Cows
Source: MDPI journal article supplement (doi:10.3390/metabo12020142), 2022-02-03
Supplement: s1 [file s1]

## Supplementary Materials

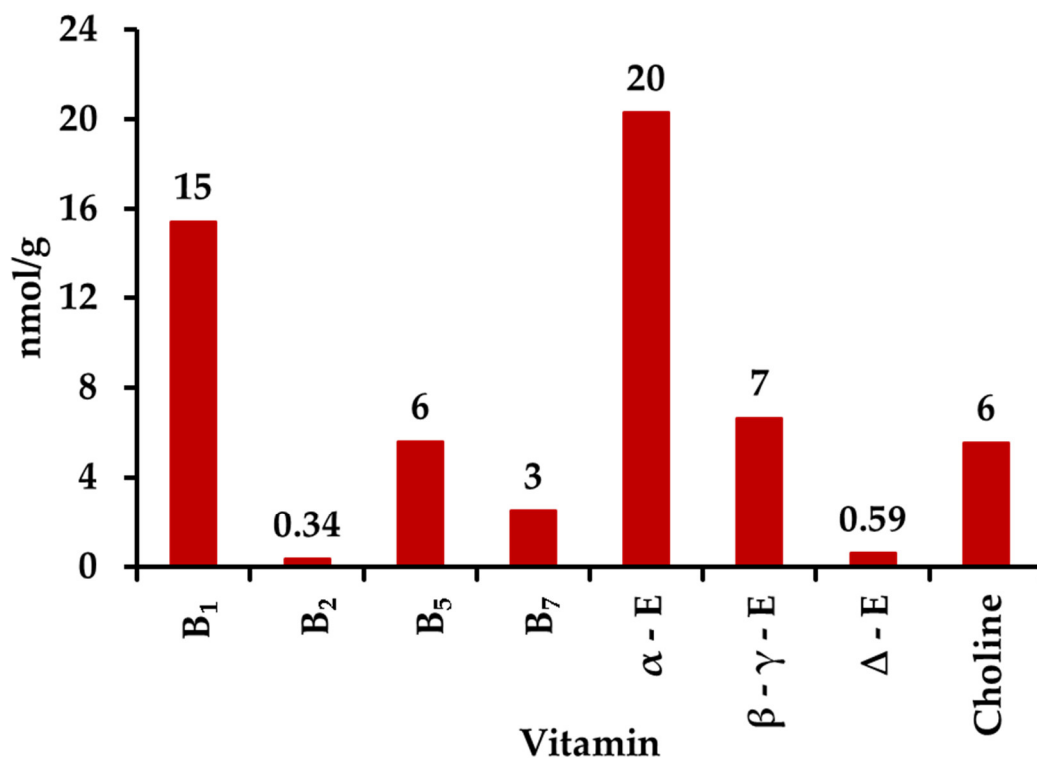

**Supplementary Figure S1.** Concentrations of predominant fecal vitamins and choline (nmol/g of fresh feces) in dairy cows across treatments. Treatments were: 1- Heat stress; 2- Heat stress with higher Vitamin D and Ca (1,820 IU/kg and 1.5 % Ca); 3- Thermoneutral, pair-feeding. Treatments were allocated within two plots differing in basal concentrations of Vitamin E and Se (High: 200 IU/kg Vit. E and 1.2 mg/kg Se; Low: 20 IU/kg Vit. E and 0.3 mg/kg Se). Fecal metabolite data were obtained at day 14 of treatment initiation, and analyzed using a LC-MS/MS custom assay.

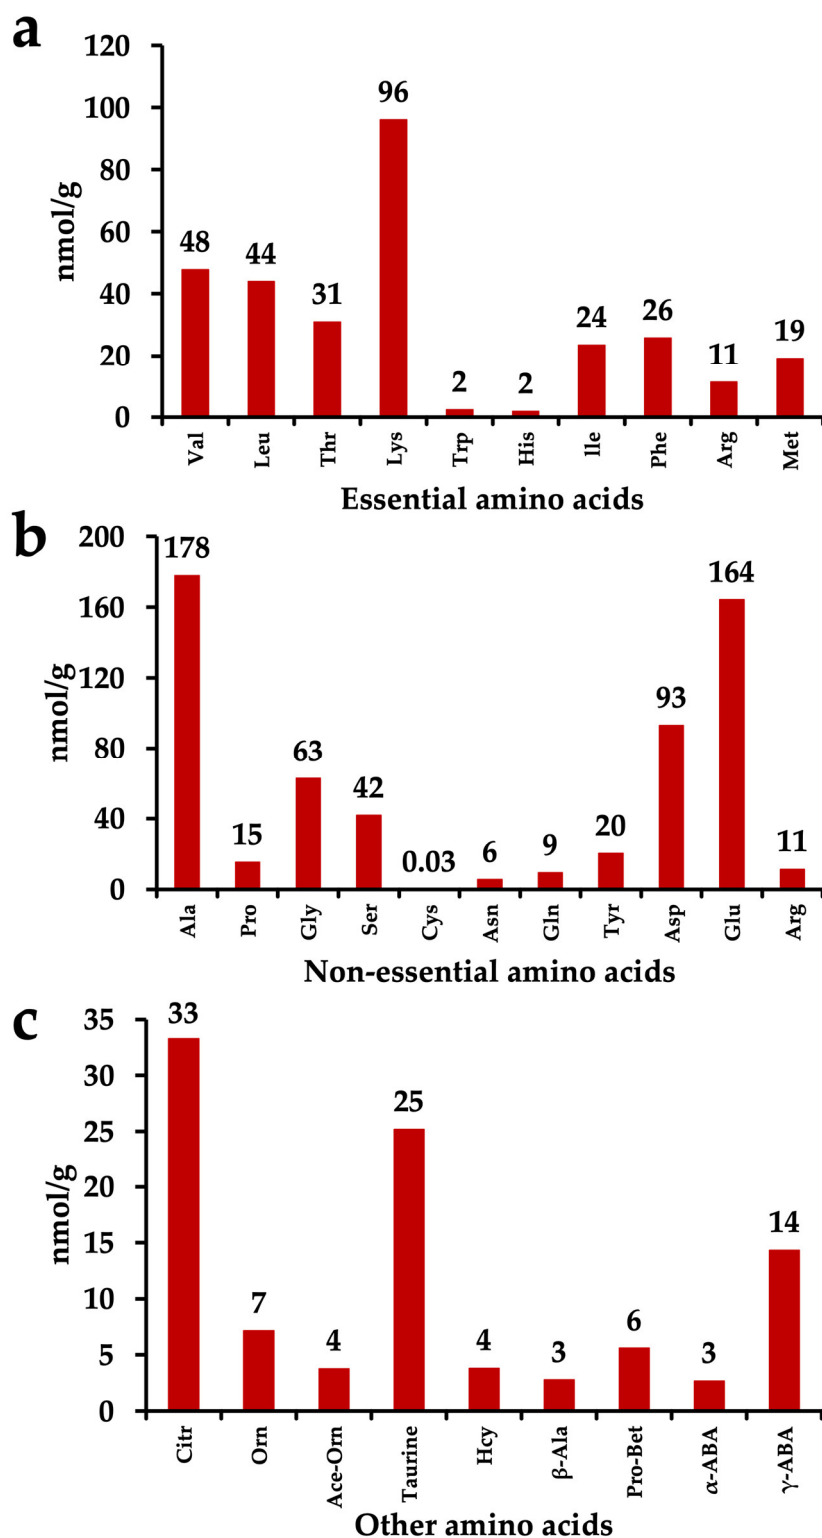

**Supplementary Figure S2.** Concentrations of amino acids (nmol/g of fresh feces) in dairy cows across treatments. **a)** Essential amino acids, **b)** Non-essential amino acids and **c)** Other amino acids. Treatments were: 1- Heat stress; 2- Heat stress with higher Vitamin D<sub>3</sub> and Ca (1,820 IU/kg and 1.5 % Ca); 3- Thermoneutral, pair-feeding. Treatments were allocated within two plots differing in basal concentrations of Vitamin E and Se (High: 200 IU/kg Vit. E and 1.2 mg/kg Se; Low: 20 IU/kg Vit. E and 0.3 mg/kg Se). Fecal metabolite data were obtained at day 14 of treatment initiation, and analyzed using a LC-MS/MS custom assay.

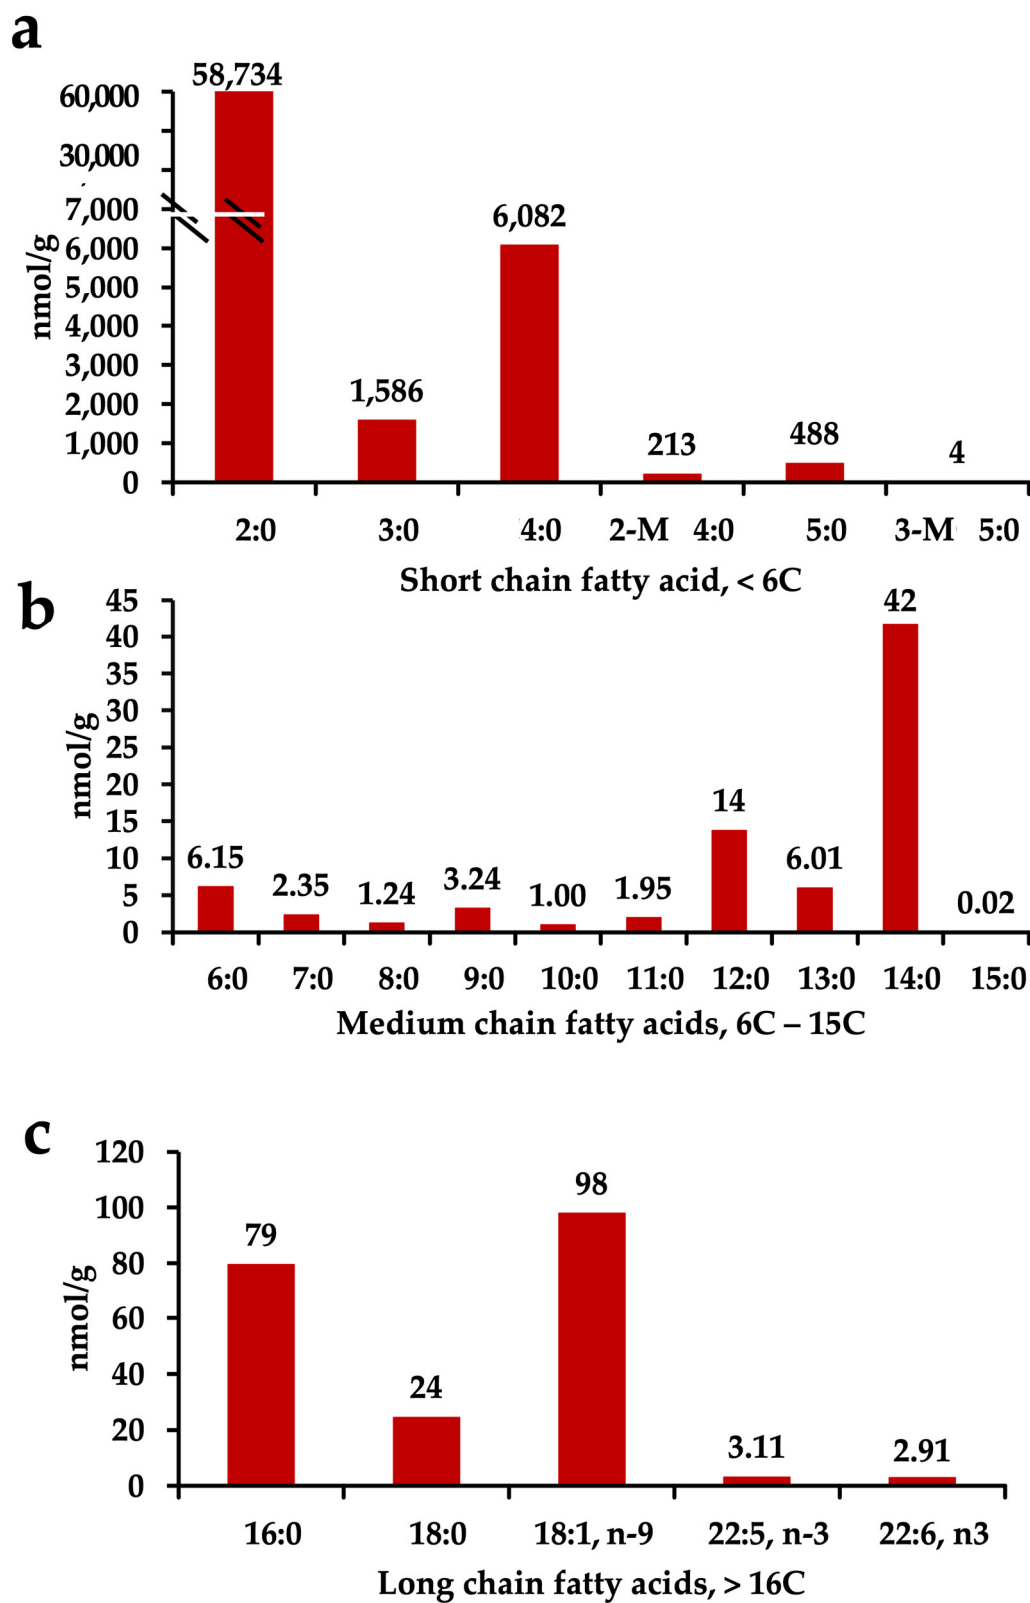

**Supplementary Figure S3.** Concentrations of fatty acids (nmol/g of fresh feces) in dairy cows across treatments. **a)** short-chain fatty acids (< 6C), **b)** Medium chain fatty acids (6C – 15C), **c)** Long chain fatty acids (> 16C). Treatments were: 1- Heat stress; 2- Heat stress with higher Vitamin D<sub>3</sub> and Ca (1,820 IU/kg and 1.5 % Ca); 3- Thermoneutral, pair-feeding. Treatments were allocated within two

plots differing in basal concentrations of Vitamin E and Se (High: 200 IU/kg Vit. E and 1.2 mg/kg Se; Low: 20 IU/kg Vit. E and 0.3 mg/kg Se). Fecal metabolite data were obtained at day 14 of treatment initiation, and analyzed using a LC-MS/MS custom assay.

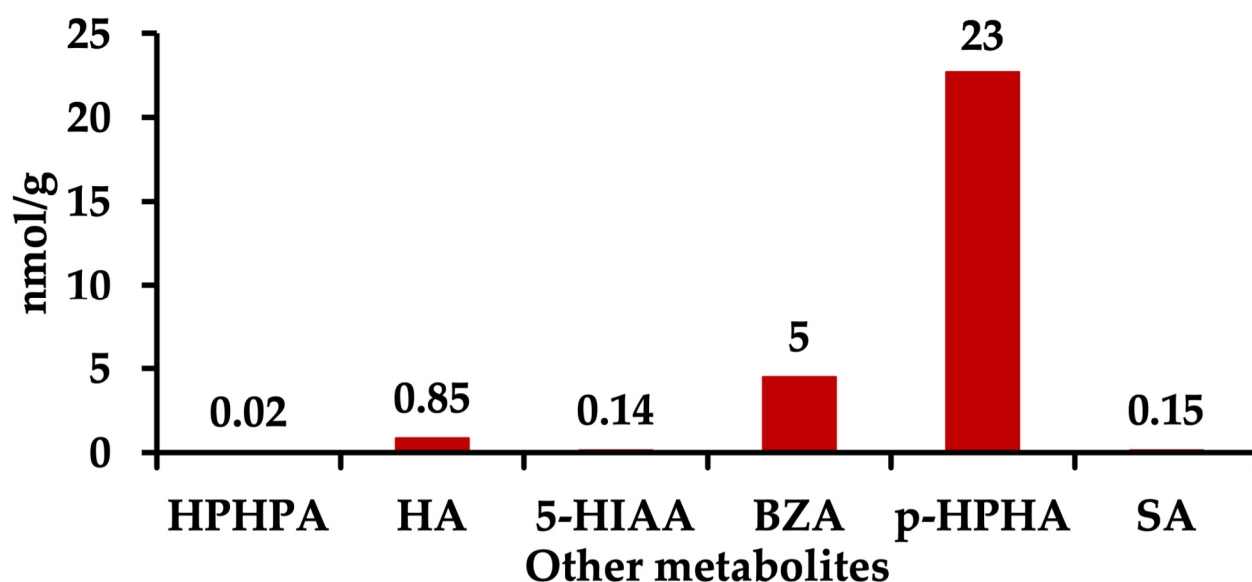

**Supplementary Figure S4.** Concentrations of various fecal metabolites (nmol/g of fresh feces) in dairy cows across treatments. Fecal metabolites concentration was obtained using a LC-MS/MS custom assay. 3-(3-hydroxyphenyl)-3-hydroxypropionic acid (HPHPA), hippuric acid (HA), 5-Hydroxyindoleacetic acid (5-HIAA), benzoic acid (BZA), p-Hydroxyindoleacetic acid (p-HPHA), and salicylic acid (SA). Treatments were: 1- Heat stress; 2- Heat stress with higher Vitamin D<sub>3</sub> and Ca (1,820 IU/kg and 1.5 % Ca); 3- Thermoneutral, pair-feeding. Treatments were allocated within two plots differing in basal concentrations of Vitamin E and Se (High: 200 IU/kg Vit. E and 1.2 mg/kg Se; Low: 20 IU/kg Vit. E and 0.3 mg/kg Se). Fecal metabolite data were obtained at day 14 of treatment initiation, and analyzed using a LC-MS/MS custom assay.

**Supplementary Table S1.** Metabolites concentration (nmol/g of fresh feces) in fecal samples of dairy cows using a LC-MS/MS custom assay. ND = not detected.

| Metabolite                       | Mean  | Std deviation | Minimum | Maximum |
|----------------------------------|-------|---------------|---------|---------|
| Vitamin B <sub>1</sub>           | 15.4  | 6.09          | 0.45    | 28.4    |
| Vitamin B <sub>2</sub>           | 0.34  | 0.16          | 0.20    | 0.98    |
| Vitamin B <sub>3</sub>           | 0.03  | 0.00          | 0.03    | 0.03    |
| Vitamin B <sub>3</sub> -amide    | 0.05  | 0.00          | 0.05    | 0.05    |
| Vitamin B <sub>5</sub>           | 5.61  | 2.79          | 1.56    | 12.2    |
| Vitamin B <sub>6</sub>           | 0.060 | 0.00          | 0.06    | 0.06    |
| Vitamin B <sub>7</sub>           | 2.50  | 0.91          | 0.92    | 4.62    |
| Vitamin B <sub>9</sub>           | 0.036 | 0.02          | 0.01    | 0.10    |
| Vitamin B <sub>12</sub>          | ND    | ND            | ND      | ND      |
| Vitamin C                        | 0.009 | 0.00          | 0.01    | 0.01    |
| Retinol                          | 23.1  | 8.90          | 9.66    | 48.3    |
| Vitamin D <sub>2</sub>           | ND    | ND            | ND      | ND      |
| 25-HydroxyVitamin D <sub>3</sub> | ND    | ND            | ND      | ND      |
| $\alpha$ - Tocopherol            | 20.3  | 14.3          | 3.93    | 60.6    |
| $\beta$ + $\gamma$ - Tocopherol  | 6.65  | 3.94          | 1.09    | 17.7    |
| $\Delta$ - Tocopherol            | 0.59  | 0.77          | 0.01    | 3.03    |
| Alanine                          | 178   | 68.4          | 44.1    | 339     |
| Arginine                         | 11.4  | 8.06          | 2.36    | 46.5    |
| Asparagine                       | 5.571 | 1.42          | 2.69    | 8.79    |
| Aspartate                        | 93.1  | 51.6          | 6.39    | 235     |
| Citrulline                       | 33.3  | 14.18         | 11.25   | 64.5    |
| Glutamate                        | 164   | 89.1          | 29.1    | 504     |
| Glutamine                        | 9.35  | 5.11          | 3.18    | 28.8    |
| Glycine                          | 62.8  | 25.2          | 17.5    | 154     |
| Histidine                        | 1.89  | 2.68          | 0.07    | 10.9    |
| Tyrosine                         | 20.3  | 9.27          | 4.86    | 43.8    |
| Valine                           | 47.9  | 19.2          | 11.3    | 92.4    |
| Isoleucine                       | 23.5  | 10.8          | 4.95    | 47.4    |
| Leucine                          | 44.0  | 20.9          | 11.6    | 104     |
| Lysine                           | 96.1  | 39.2          | 23.8    | 179     |
| Methionine                       | 19.1  | 9.01          | 1.93    | 39.9    |
| Ornithine                        | 7.15  | 5.99          | 0.17    | 24.5    |
| Phenylalanine                    | 25.8  | 10.7          | 5.28    | 51.6    |
| Proline                          | 15.3  | 8.26          | 0.18    | 34.2    |
| Serine                           | 41.7  | 16.2          | 11.1    | 72.3    |
| Threonine                        | 30.9  | 12.7          | 8.52    | 56.1    |
| Tryptophan                       | 2.44  | 1.49          | 0.04    | 5.37    |
| Methylhistidine                  | 0.45  | 0.33          | 0.00    | 1.39    |

|                                 |        |        |        |        |
|---------------------------------|--------|--------|--------|--------|
| Choline                         | 5.55   | 2.89   | 1.93   | 13.4   |
| Sarcosine                       | ND     | ND     | ND     | ND     |
| Acetyl-Ornithine                | 3.80   | 3.12   | 0.39   | 12.4   |
| Asymmetric dimethylarginine     | ND     | ND     | ND     | ND     |
| Taurine                         | 25.3   | 143    | 0.02   | 858    |
| Trimethylamine N-oxide          | ND     | ND     | ND     | ND     |
| Homocysteine                    | 3.81   | 5.59   | 0.15   | 16.7   |
| trans-OH-Proline                | 0.076  | 0.13   | 0.03   | 0.58   |
| Alpha-amino adipic acid         | ND     | ND     | ND     | ND     |
| Carnosine                       | ND     | ND     | ND     | ND     |
| $\beta$ - Alanine               | 2.80   | 3.66   | 0.42   | 19.0   |
| Cystathionine                   | ND     | ND     | ND     | ND     |
| Proline-Betaine                 | 5.60   | 1.75   | 2.36   | 8.97   |
| Caffeine                        | ND     | ND     | ND     | ND     |
| $\alpha$ - Amino-N-butyric acid | 2.69   | 2.83   | 0.02   | 11.0   |
| $\gamma$ - Aminobutyric acid    | 14.3   | 7.62   | 2.76   | 36.6   |
| Anserine                        | ND     | ND     | ND     | ND     |
| Cotinine                        | ND     | ND     | ND     | ND     |
| Trigonelline                    | ND     | ND     | ND     | ND     |
| Acetic acid                     | 58,733 | 14,244 | 36,600 | 87,600 |
| Propionic acid                  | 1,586  | 557    | 816    | 3,150  |
| Butyric+Isobutyric acid         | 6,082  | 2,107  | 2,703  | 12,600 |
| 2-Methylbutyric acid            | 213    | 139    | 51.60  | 591    |
| Valeric+Isovaleric acid         | 4,878  | 211    | 187    | 1,419  |
| 3-Methylvaleric acid            | 4.33   | 3.31   | 0.01   | 12.0   |
| Caproic acid                    | 6.15   | 3.44   | 0.01   | 14.8   |
| 2-Methylhexanoic acid           | ND     | ND     | ND     | ND     |
| Heptanoic acid                  | 2.35   | 0.86   | 0.62   | 3.78   |
| Caprylic acid                   | 1.24   | 0.45   | 0.28   | 2.08   |
| Pelargonic acid                 | 3.24   | 1.18   | 1.04   | 6.06   |
| Capric acid                     | 1.00   | 0.50   | 0.20   | 2.30   |
| Undecylic acid                  | 1.95   | 0.63   | 0.61   | 3.18   |
| Lauric acid                     | 13.8   | 5.37   | 3.15   | 23.4   |
| Tridecylic acid                 | 6.01   | 4.06   | 1.18   | 16.9   |
| Myristic acid                   | 41.6   | 24.5   | 13.35  | 120.9  |
| Pentadecylic acid               | ND     | ND     | ND     | ND     |
| Palmitic acid                   | 79.4   | 56.0   | 0.02   | 196    |
| Palmitoleic acid                | ND     | ND     | ND     | ND     |
| Margaric acid                   | ND     | ND     | ND     | ND     |
| Heptadecenoic acid              | ND     | ND     | ND     | ND     |
| Stearic acid                    | 24.5   | 29.6   | 0.20   | 135    |
| Oleic acid                      | 97.9   | 50.3   | 33.6   | 260    |

|                                   |       |      |      |      |
|-----------------------------------|-------|------|------|------|
| Linoleic acid                     | ND    | ND   | ND   | ND   |
| Alpha-linolenic acid              | ND    | ND   | ND   | ND   |
| Gamma-linolenic acid              | ND    | ND   | ND   | ND   |
| cis-8, 11, 14-Eicosatrienoic acid | ND    | ND   | ND   | ND   |
| Eicosatetraenoic acid             | ND    | ND   | ND   | ND   |
| Eicosapentaenoic acid             | ND    | ND   | ND   | ND   |
| Docosapentaenoic acid             | ND    | ND   | ND   | ND   |
| Docosahexaenoic acid              | ND    | ND   | ND   | ND   |
| HPHPA <sup>a</sup>                | 0.015 | 0.06 | 0.01 | 0.37 |
| Hippuric acid                     | 0.847 | 0.44 | 0.03 | 2.04 |
| 5-Hydroxyindoleacetic acid        | 0.143 | 0.00 | 0.14 | 0.14 |
| Benzoic acid                      | 4.51  | 2.16 | 0.29 | 10.2 |
| p-HPHA <sup>b</sup>               | 22.7  | 27.6 | 1.63 | 127  |
| Salicylic acid                    | ND    | ND   | ND   | ND   |

<sup>a</sup>3-(3-hydroxyphenyl)-3-hydroxypropionic acid (HPHPA)

<sup>b</sup>p-Hydroxyindoleacetic acid (p-HPHA)
